# Supplementary material for: Patient safety in undergraduate medical education: Implementation of the topic in the anaesthesiology core curriculum at the University Medical Center Hamburg-Eppendorf
Source: PubMed Central journal article supplement (PMC6446467; doi:10.3205/zma001220), 2019-03-15
Supplement: JME-36-2-12-s-003.pdf [file JME-36-2-12-s-003.pdf]

Dear students,

The following checklist is intended as a guide for learning practical and theoretical skills during the bedside teaching in anaesthesiology.

### Checklist for learning skills during the bedside teaching in anaesthesiology:

Name: \_\_\_\_\_

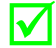

- Basic monitoring set up
- Preoperative checks performed (incl. patient identification, nil-by-mouth, allergies, intubation hindrances, procedure identification, patient clarification)
- Intravenous cannula inserted (on anaesthetised patient)
- Mask respiration performed
- Demonstration received of the intubation procedure
- Clinical examination performed (in particular, auscultation of heart and lungs, determination of pupil status)
- Infusion prepared and demonstration received of medication labelling
- Demonstration received of a transfusion as per the transfusion guidelines
- Bedside test performed
- Demonstration received of administration of a general anaesthesia (“9 steps”)
- Demonstration received of the basics of artificial respiration
- Demonstration received of the basics of anaesthesia
- Demonstration received of extended monitoring (arteries, CVC; indication and measured values).
- Participated in “team timeout”
