# Supplementary material for: Patient safety in undergraduate medical education: Implementation of the topic in the anaesthesiology core curriculum at the University Medical Center Hamburg-Eppendorf
Source: PubMed Central journal article supplement (PMC6446467; doi:10.3205/zma001220), 2019-03-15
Supplement: JME-36-2-12-s-004.pdf [file JME-36-2-12-s-004.pdf]

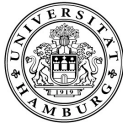

## **Observation form**

### *Investigation of "patient safety in medical education"*

Students in the anaesthesia simulator

Observation date:

Scenario:

**Important note:**

Please do not communicate the topic/questions to students (-> bias)!

| <b>Question</b>               | <b>Asked?</b>            |
|-------------------------------|--------------------------|
| Last name, first name?        | <input type="checkbox"/> |
| Date of birth?                | <input type="checkbox"/> |
| Nil-by-mouth?                 | <input type="checkbox"/> |
| Allergies?                    | <input type="checkbox"/> |
| Teeth/look inside mouth?      | <input type="checkbox"/> |
| Premedication received?       | <input type="checkbox"/> |
| Procedure, surgery site/side? | <input type="checkbox"/> |

In case of questions, please do not hesitate to contact Nicolas Hoffmann on (9)-50318!

**Completed forms can be submitted to Nicolas Hoffmann's pigeonhole (copy room).**

Thank you for your cooperation!
